# Supplementary figures and images for: Single-cell analysis reveals innate lymphoid cell lineage infidelity in atopic dermatitis
Source: PubMed Central journal article supplement — J Allergy Clin Immunol. 2022 Feb;149(2):624–39. doi: 10.1016/j.jaci.2021.07.025 (PMC9130781; doi:10.1016/j.jaci.2021.07.025), 2022-02

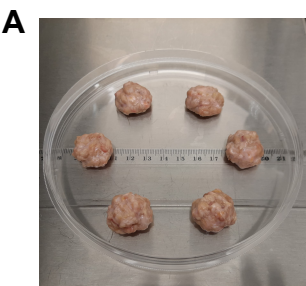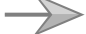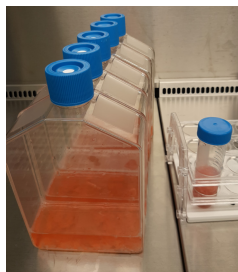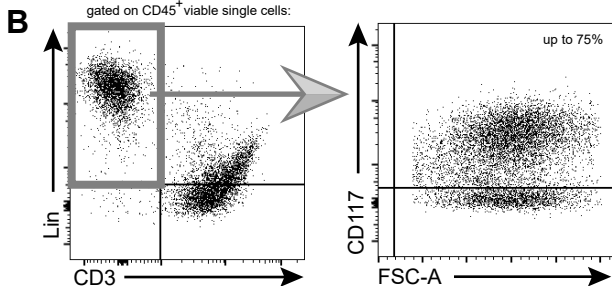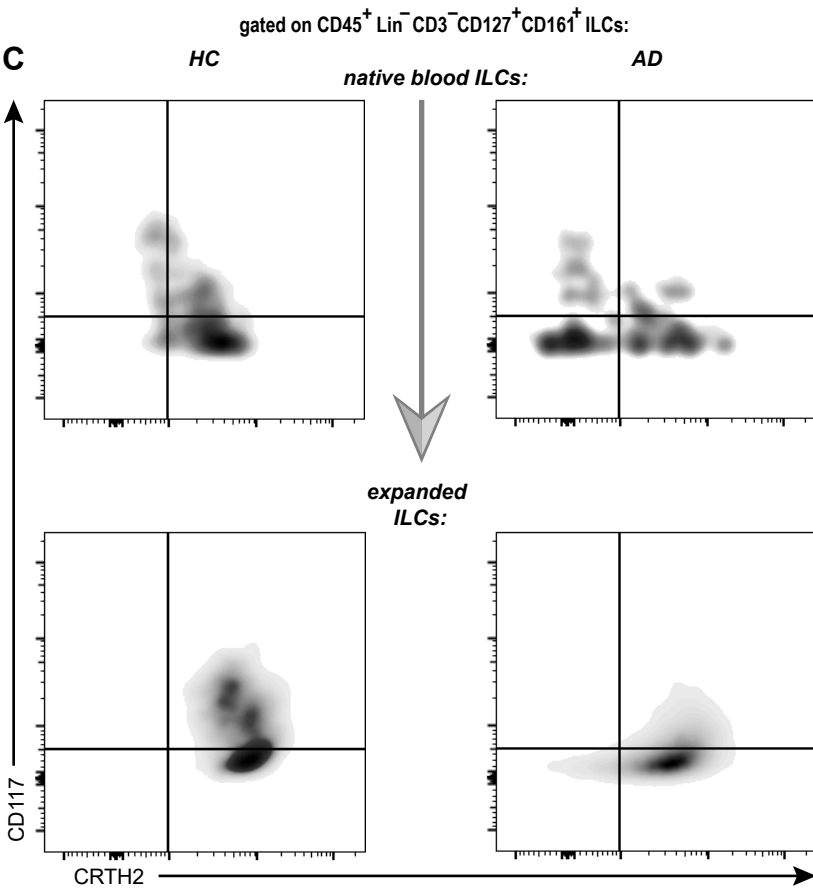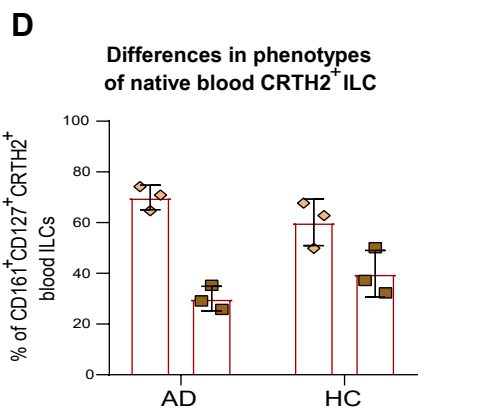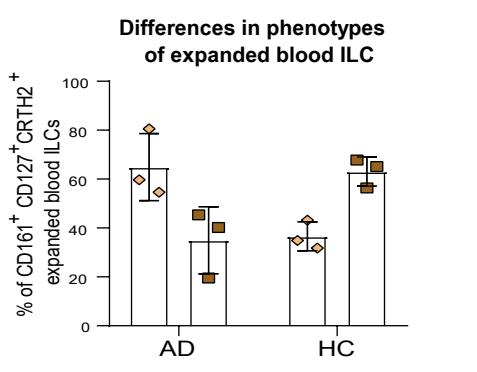

Supplement: mmc10.pdf [file mmc10.pdf]

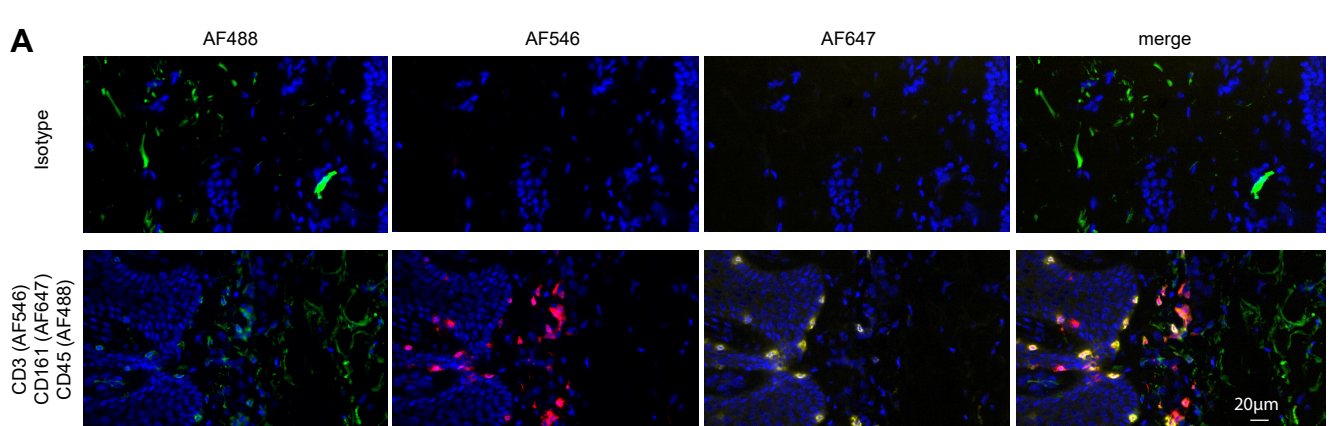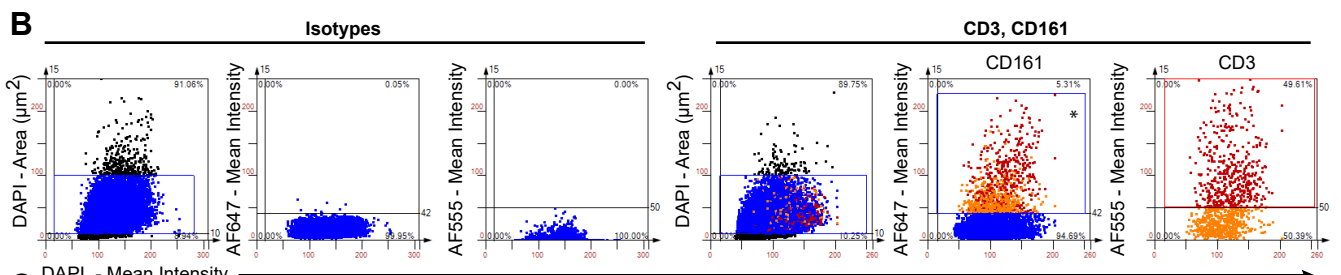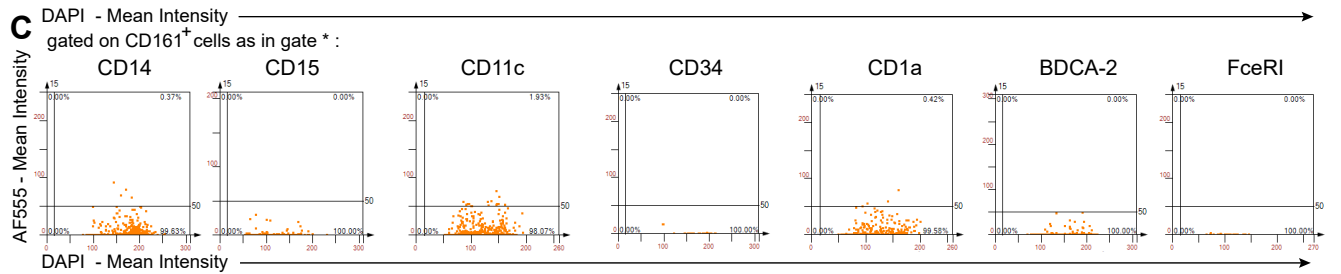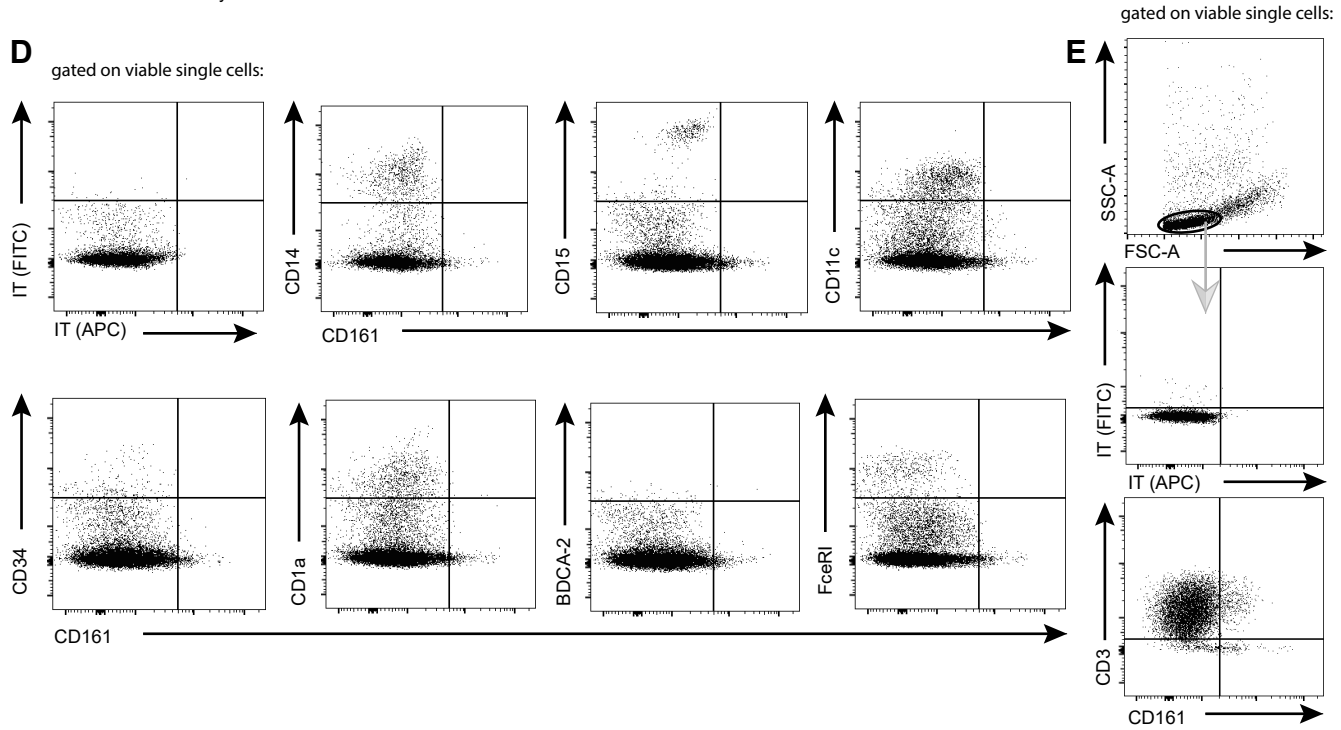

Supplement: mmc7.pdf [file mmc7.pdf]

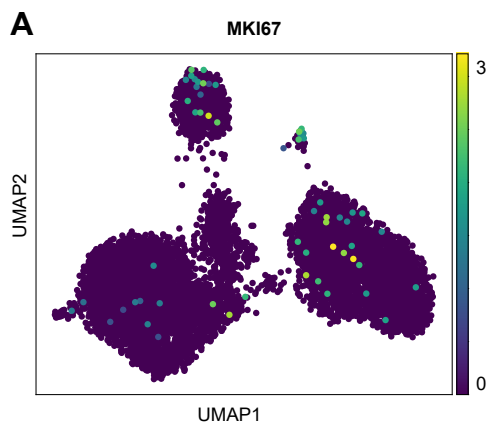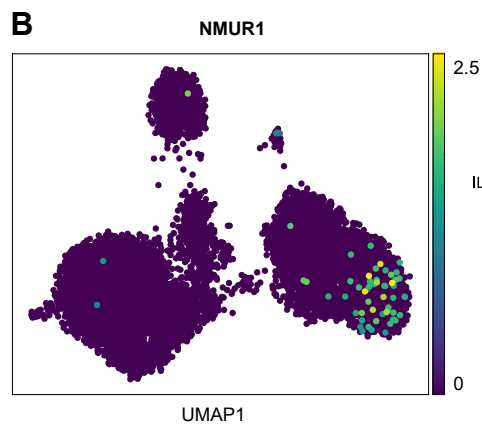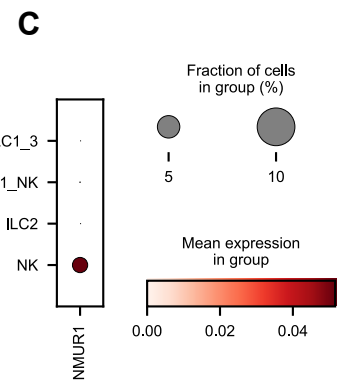

Supplement: mmc9.pdf [file mmc9.pdf]
